# Supplementary material
Source: publisher site journal article supplement (https://www.dovepress.com/article/324568)

**EMS calls during COVID-19: Early lessons learned for systems planning (A Narative Review)**

Appendix A:


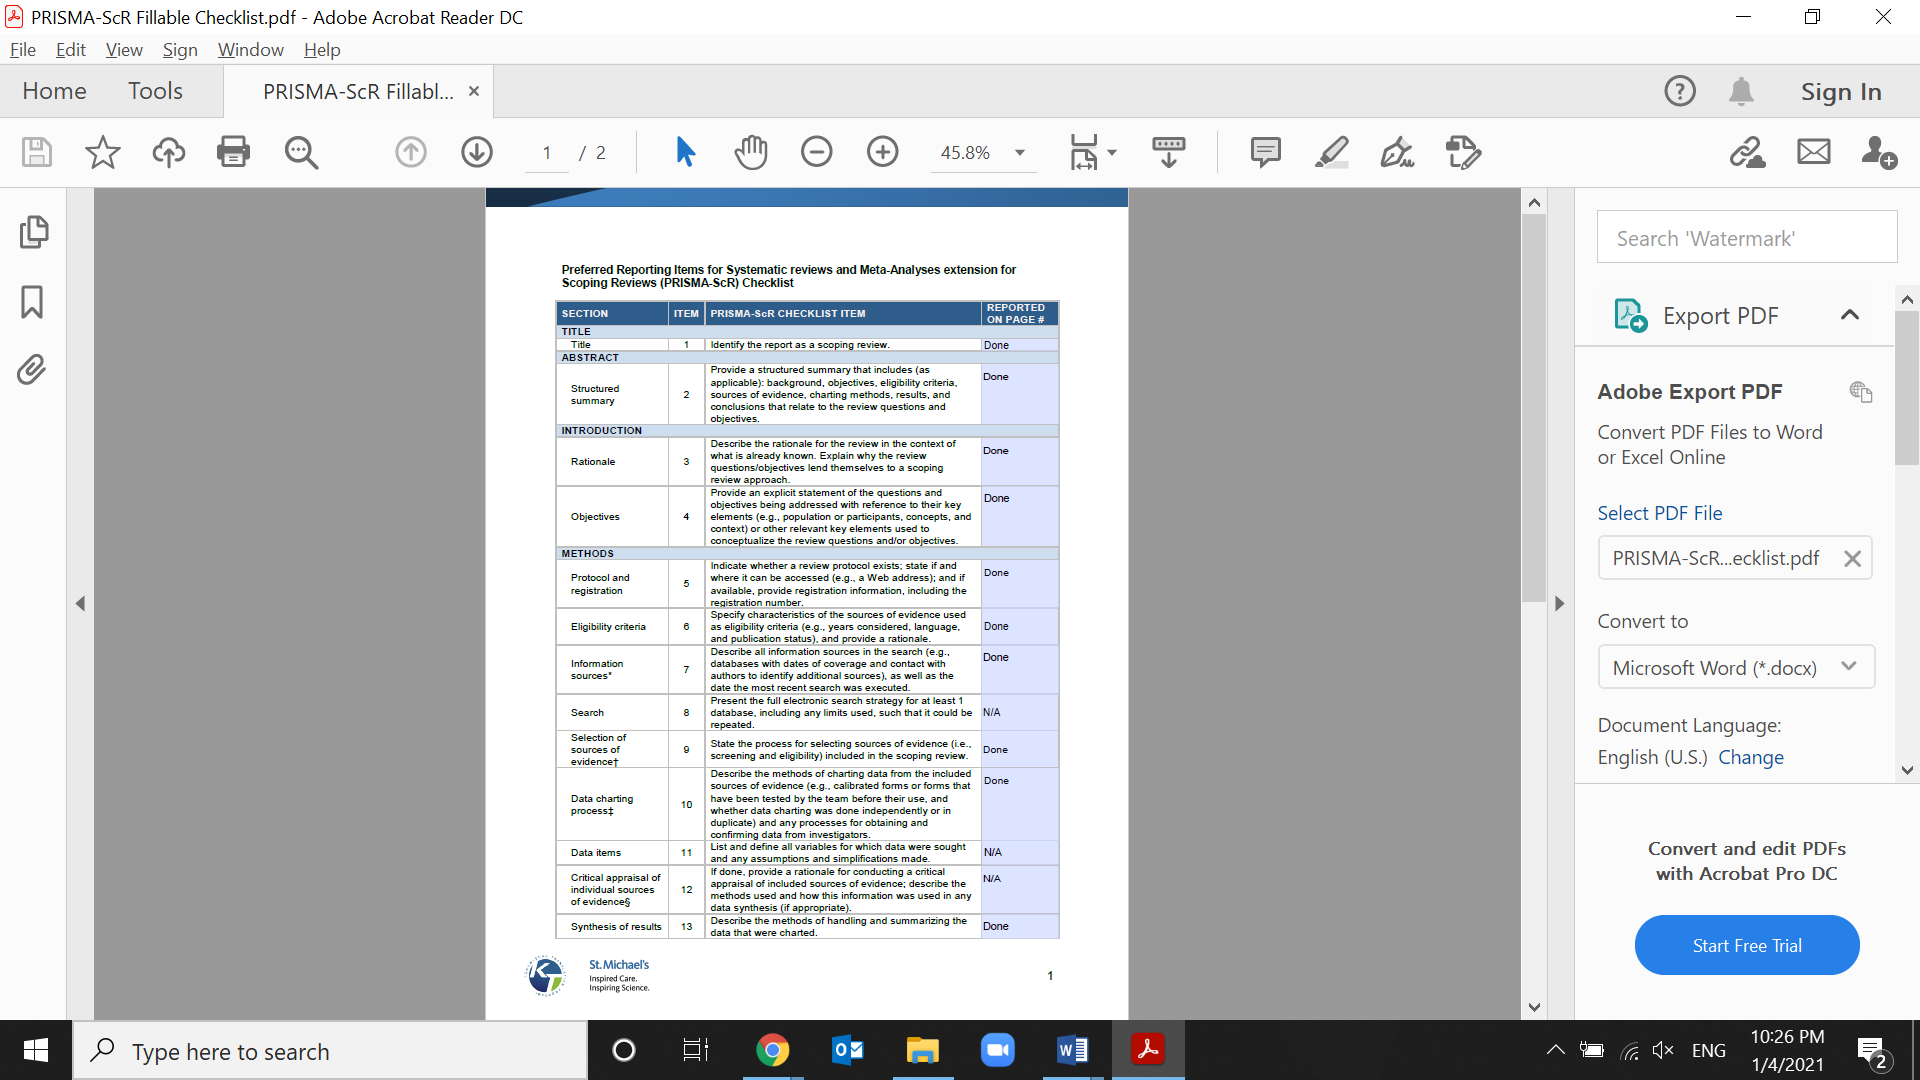

Supplement: Supplementary file 1 [file get_supplementary_file.php]
